# Supplementary material
Source: HighWire-hosted journal article supplement (http://rc.rcjournal.com/highwire/filestream/28335/field_highwire_adjunct_files/2/rc-11781-File006.docx)

**
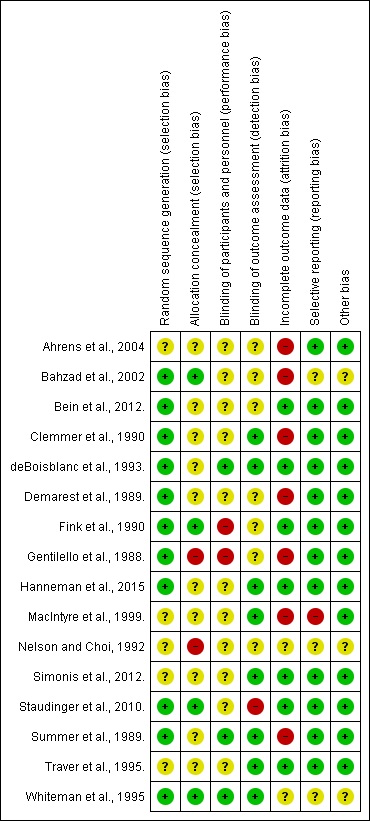
**

**Supplement 3.** Summary of risk of bias of randomized controlled trials (RCT)

Supplement: rc-11781-File006.docx [file rc-11781-File006.docx]
